# Supplementary material for: CRISPR-Based Multiplex Detection of Human Papillomaviruses for One-Pot Point-of-Care Diagnostics
Source: PubMed Central journal article supplement (PMC10949237; doi:10.1021/acssynbio.3c00655), 2024-02-13
Supplement: sb3c00655_si_001.pdf [file sb3c00655_si_001.pdf]

## **Supplementary**

### **CRISPR-based multiplex detection of human papillomaviruses for one-pot point-of-care diagnostics**

Ahmed Ghouneimy<sup>1</sup>, Zahir Ali<sup>1</sup>, Rashid Aman<sup>1</sup>, Wenjun Jiang<sup>1</sup>, Mustapha Aouida<sup>2</sup> and Magdy Mahfouz<sup>1\*</sup>

*<sup>1</sup>Laboratory for Genome Engineering and Synthetic Biology, Division of Biological Sciences, 4700 King Abdullah University of Science and Technology, Thuwal 23955-6900, Saudi Arabia.*

*<sup>2</sup>Division of Biological and Biomedical Sciences, College of Health and Life Sciences, Hamad Bin Khalifa University, Education City, Qatar Foundation, Doha, Qatar, P.O.Box: 34110).*

**\*Correspondence:** Magdy M. Mahfouz (magdy.mahfouz@kaust.edu.sa)

**Keywords:** CRISPR-Cas, Human Papillomavirus, Sexually transmitted infections, Molecular diagnostics, Multiplex detection, Point-of-Care detection, Cervical cancer

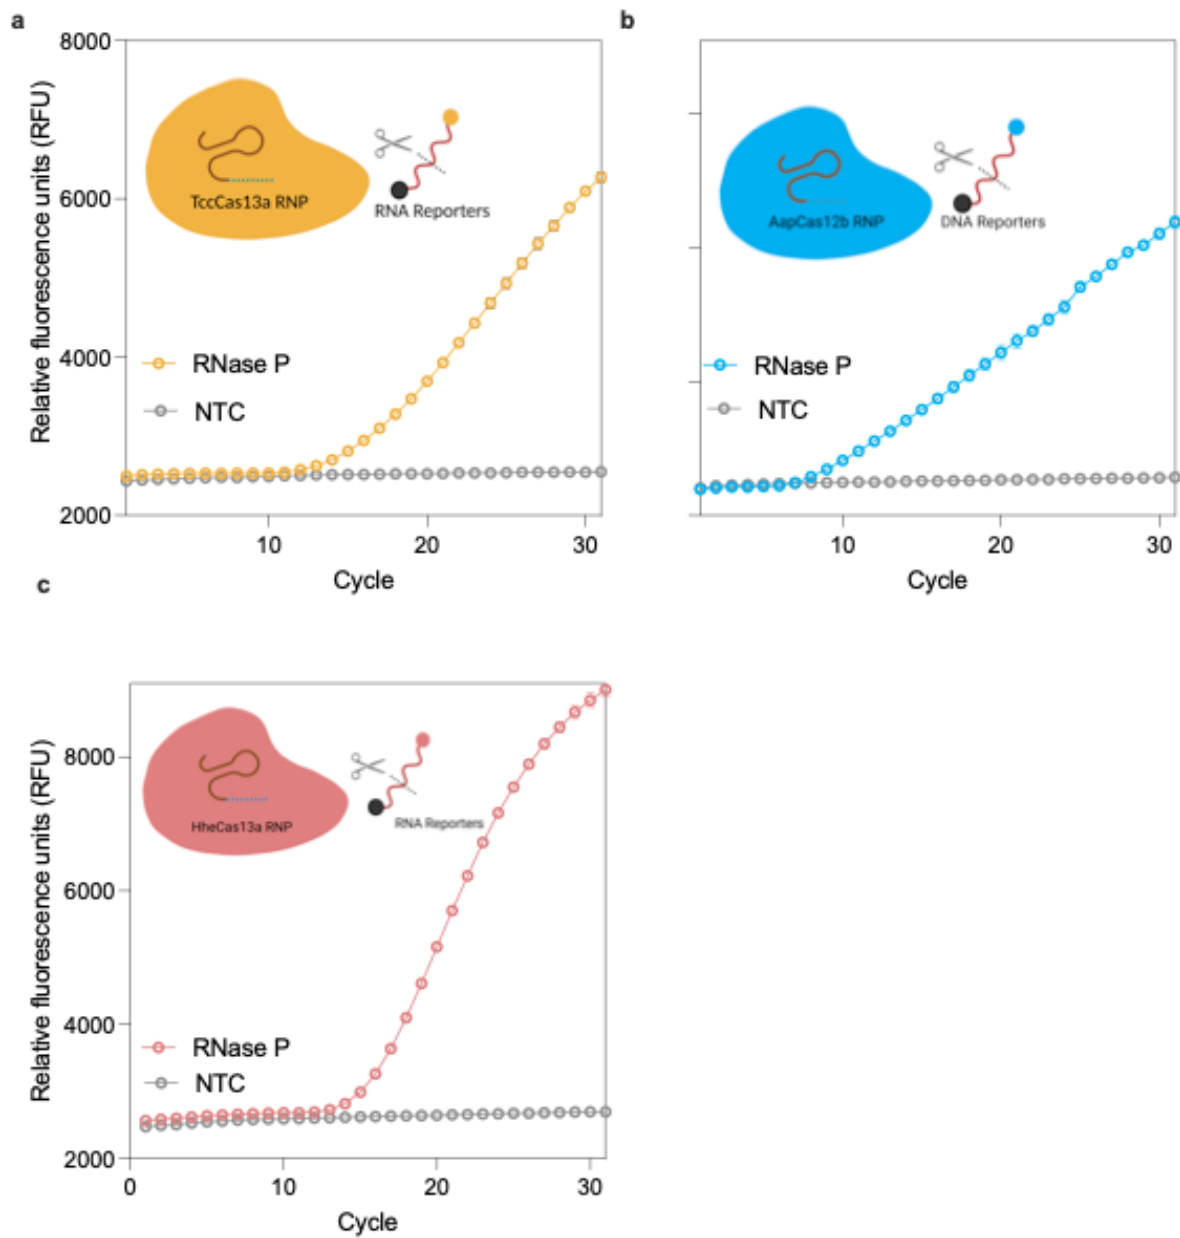

**Fig. S1 | The CRISPRD Reaction with TccCas13a, HheCas13a, and AapCas12b.** Testing the CRISPRD reaction for detecting synthetic RNase P DNA (1 ng/reaction) with (a) TccCas13a, (b) AapCas12b and (c) HheCas13a.

## HPV18 Primer Screening

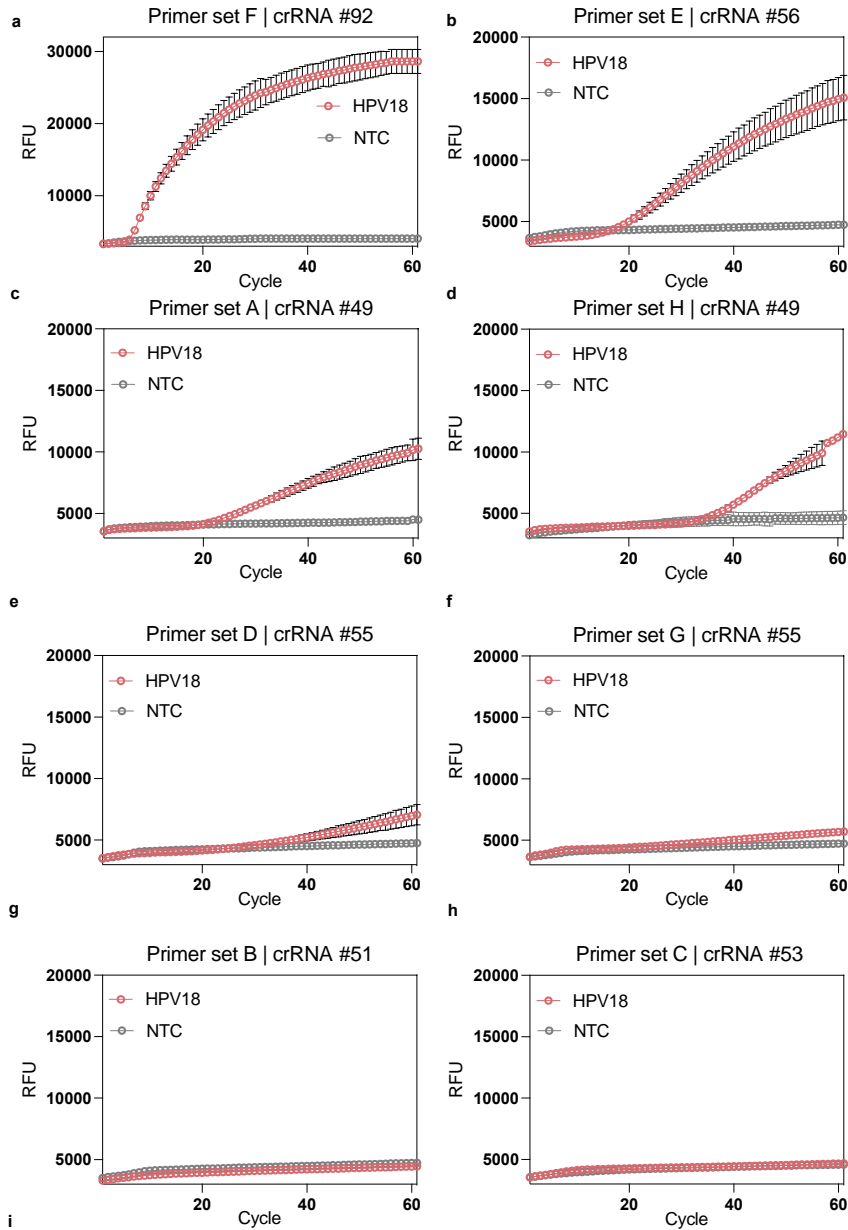

## HPV16 primer screening

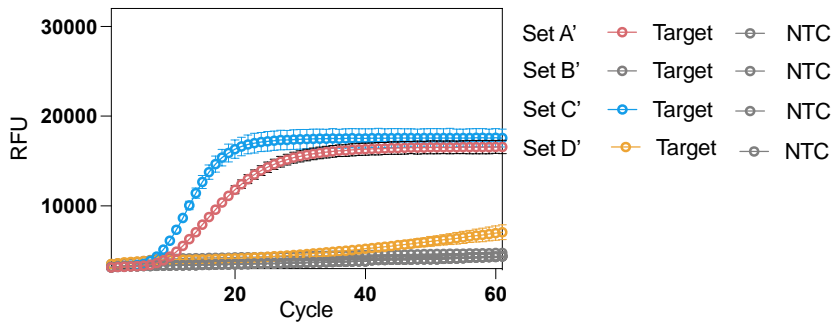

**Fig. S2 | Screening for the best-performing set of primers/crRNAs (real-time data) for HPV16 and HPV18.** a-h Eight primer sets were screened with the CRISPRD reaction for detecting HPV18 (4 ng/reaction) with HheCas13a. i Four primer sets were screened with the CRISPRD reaction for detecting HPV16 (4 ng/reaction) with AapCas12b. Plotted is the mean fluorescence of n=3 technical replicates and standard deviation. crRNA and gRNA are used interchangeably in the study.

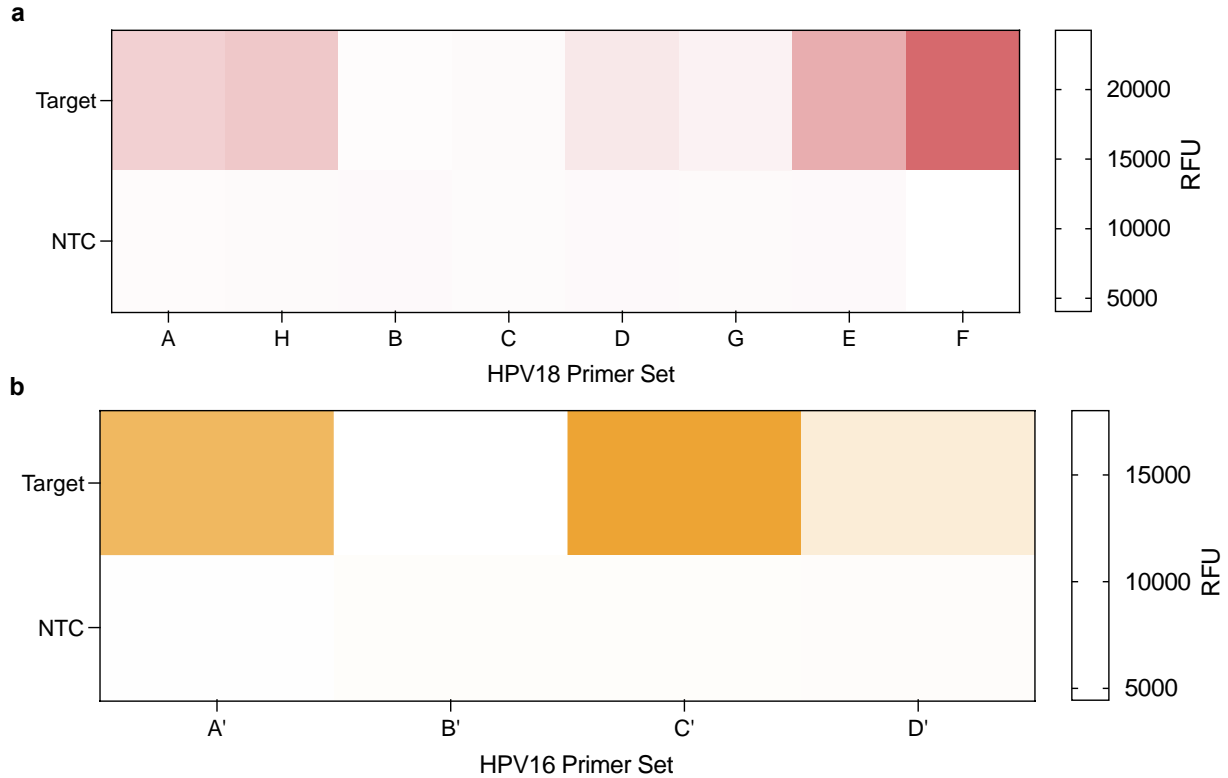

**Fig. S3 | Primer screening for HPV16 and HPV18 (Endpoint).** Endpoint fluorescence of a) 8 primer sets for HPV18 (4 ng/ reaction) and b) 4 primer sets for HPV16 (4 ng/ reaction) screened using the CRISPRD reaction: HheCas13a for HPV18 and AapCas12b for HPV16. Plotted is the mean endpoint fluorescence of n=3 technical replicates and standard deviation.

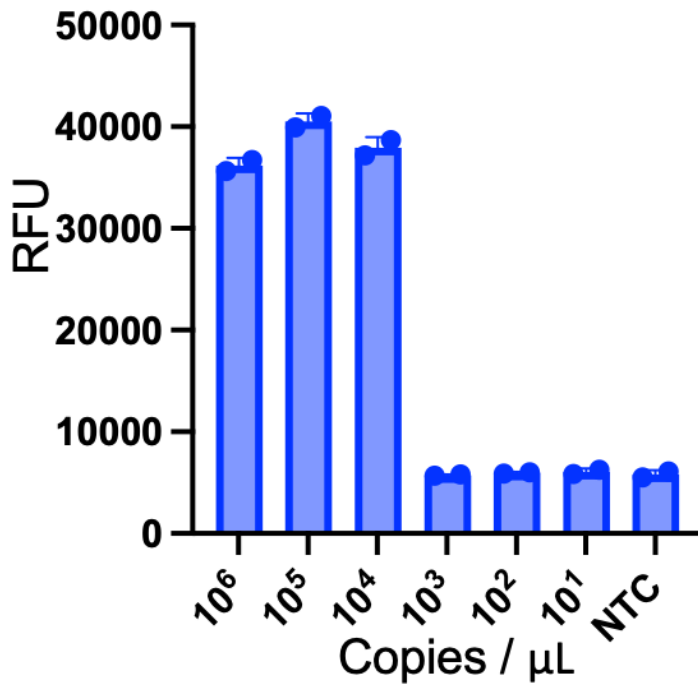

**Fig. S4 | LoD using primer set A for HPV18.** Primer set A was tested with synthetic dilutions of HPV18 DNA ranging from 0 to 1 million copies per  $\mu\text{L}$ . Plotted is the mean end-point fluorescence of incubation in the CRISPRD reaction after two hours ( $n=3$ ).

### Screening different reporters

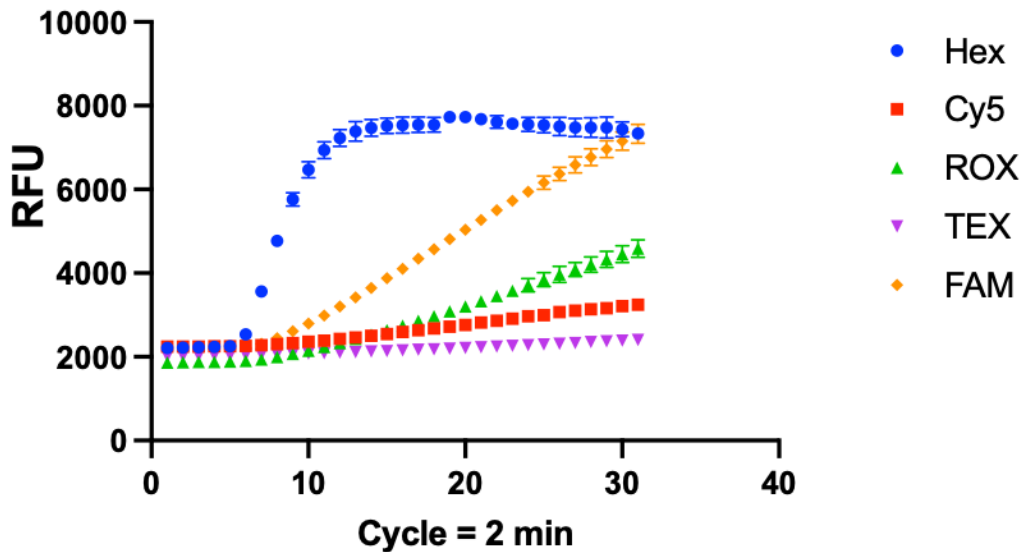

**Fig. S5 | Reporter screening.** The same reporter (Poly (rArG)) carrying different fluorophores was screened to check the sensitivity of each fluorophore.

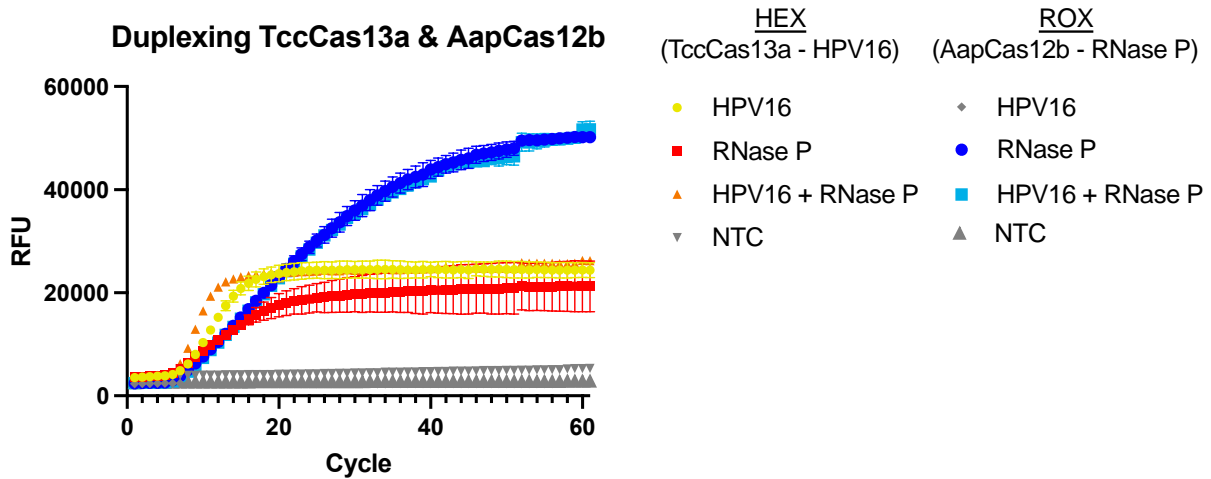

**Fig. S6 | Duplexing AapCas12b with TccCas13a.** A CRISPRD duplex reaction for detecting HPV16 and RNase P with TccCas13a and AapCas12b, respectively.

**a** AapCas12b purified from clone 1

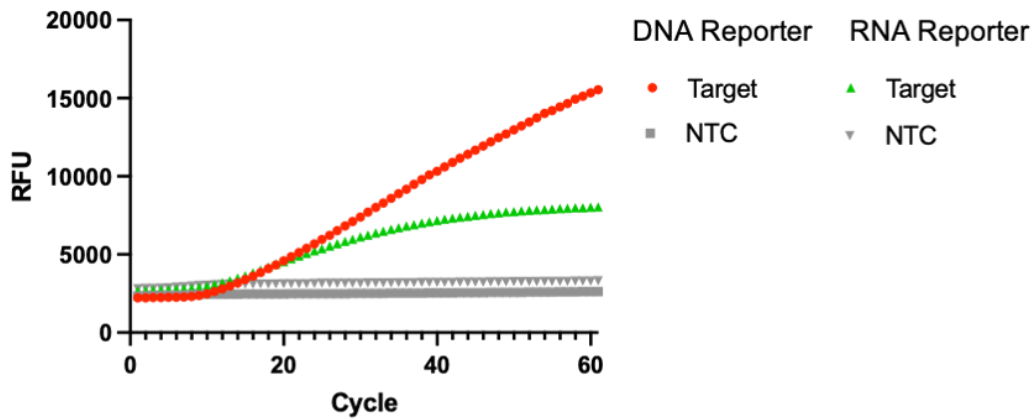

**b** AapCas12b purified from clone 2

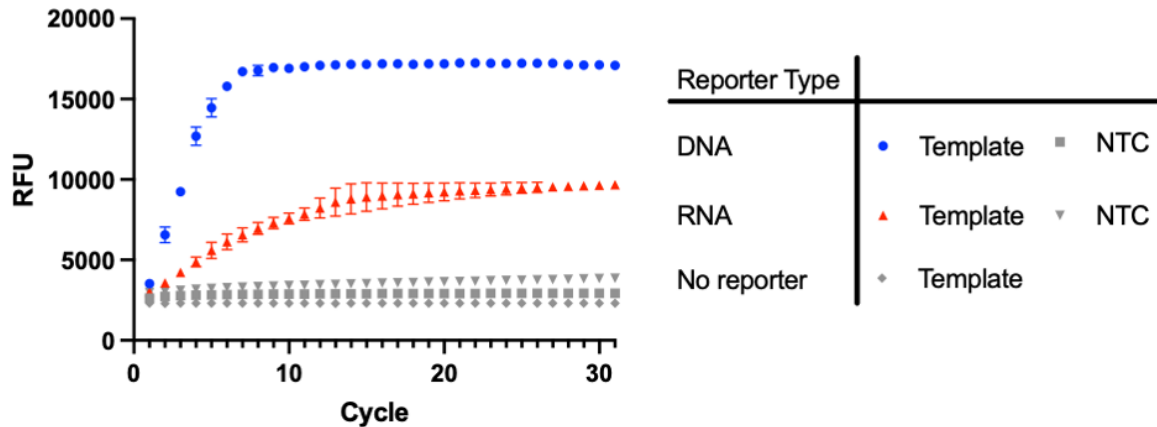

**Fig. S7 | Testing the collateral cleavage activity of AapCas12b purified from two different clones.** Two different clones of AapCas12b were tested to check their activity on an RNA reporter (poly (rArG)) compared to a DNA reporter (Poly T). Plotted is the mean real-time fluorescence data (n=3) and standard deviation.

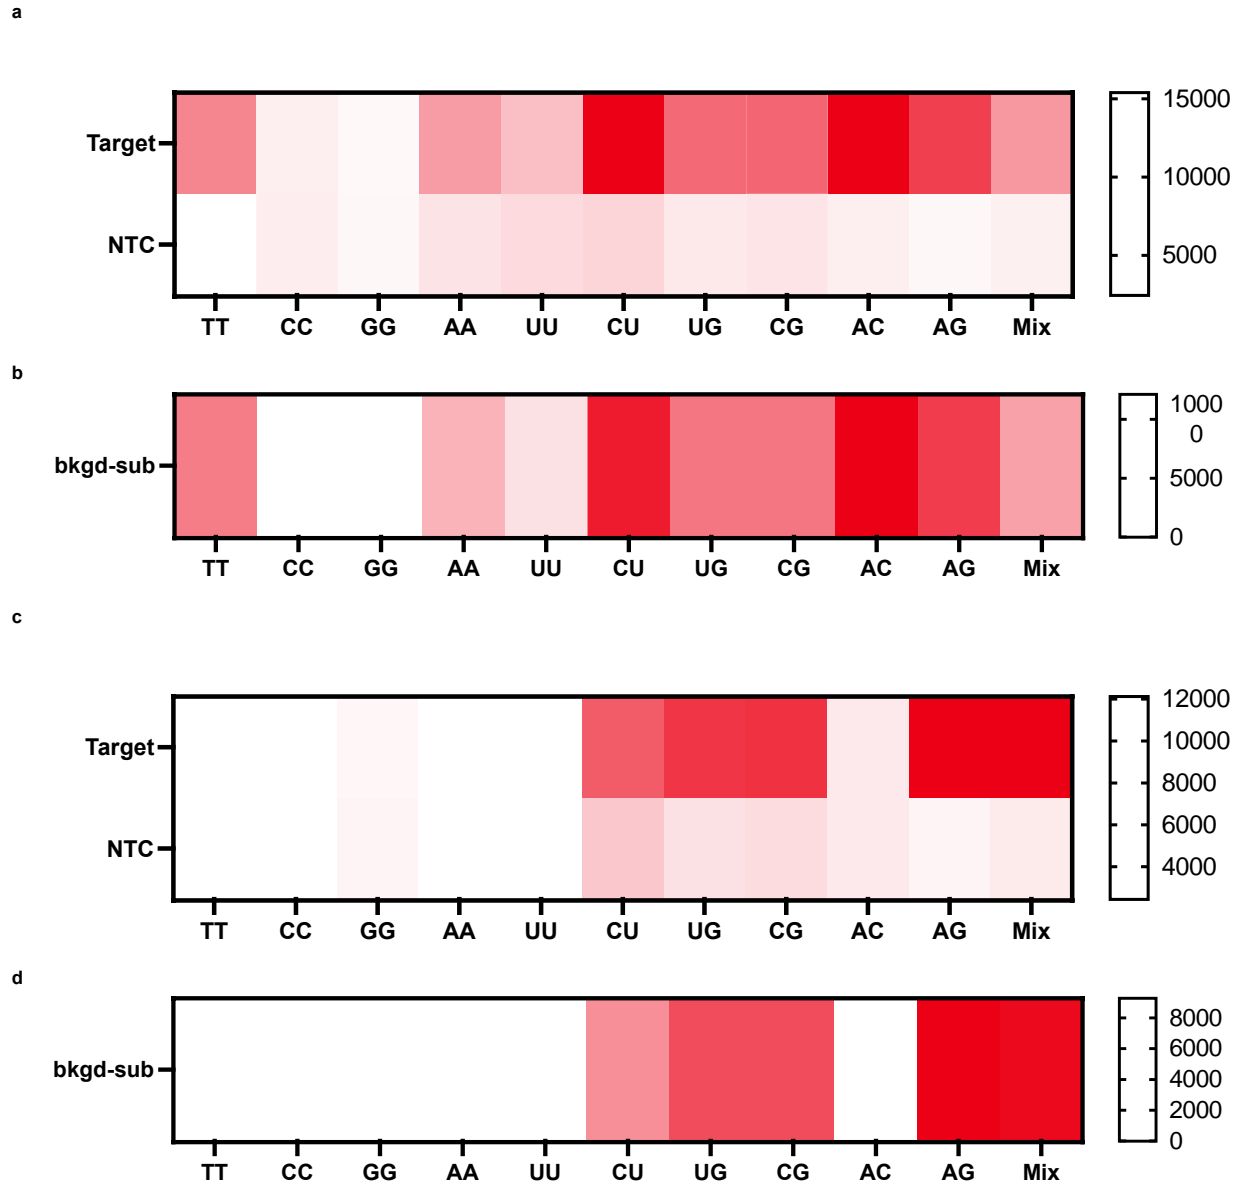

**Fig. S8 | Activity of AapCas12b and TccCas13a on RNA reporters with different nucleotide compositions.** Activated AapCas12b RNPs were incubated with different RNA reporters. The DNA reporter is indicated as TT; the rest are RNA reporters. Plotted is the end-point fluorescence after a 1-hour incubation (n=3). **a-b** AapCas12b activity on different reporters. **c-d** TccCas13a activity on different reporters. Target concentration is 4 ng/uL. bkgd-sub = Target fluorescence – NTC fluorescence.

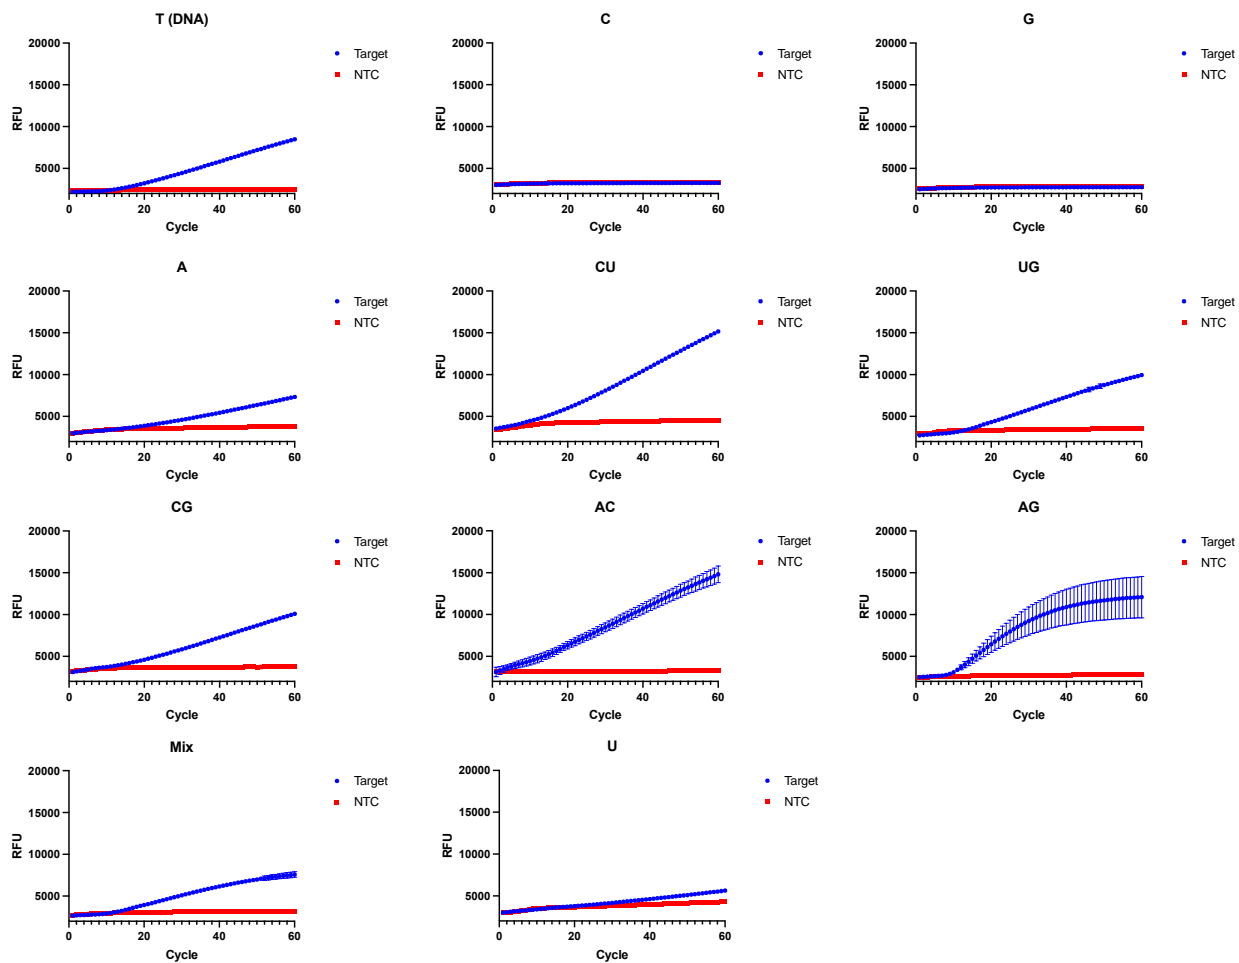

**Fig. S9 | Reporter screening with AapCas12b real-time data.** Activated AapCas12b RNPs were incubated with different RNA reporters. The DNA reporter is indicated as TT; the rest are RNA reporters. Plotted is the end-point fluorescence after a 1-hour incubation (n=3).

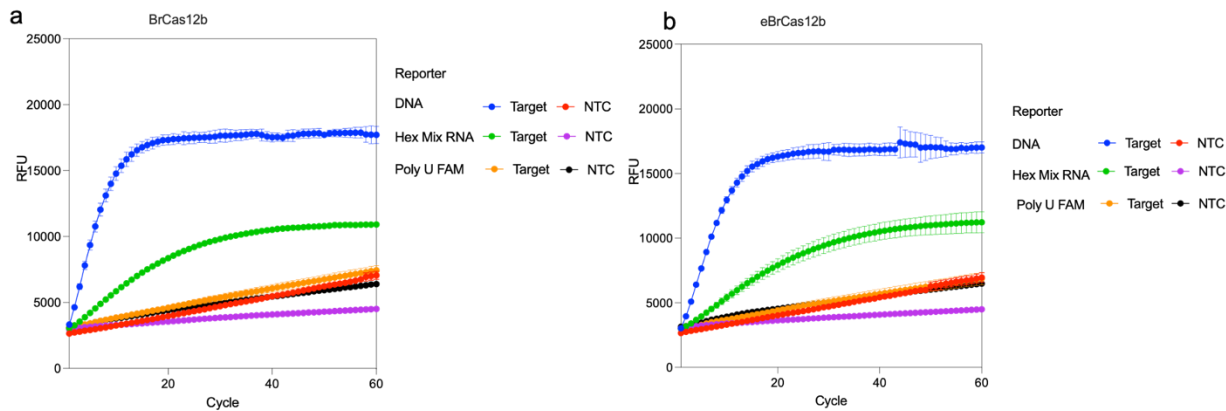



**Fig. S10 | BrCas12b cleaves RNA and DNA reporters.** Activated BrCas12b (a) and eBrCas12b (b) was incubated with RNA or DNA reporters.

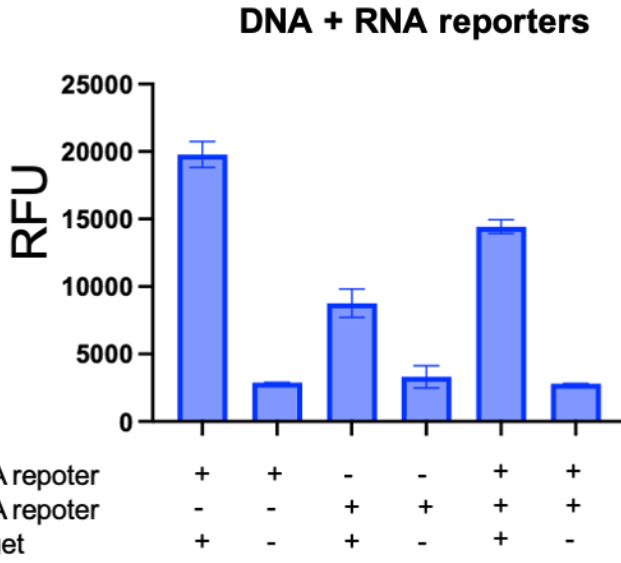

**Fig. S11 | Testing AapCas12b with RNA and DNA reporters.** Activated AapCas12b RNP was incubated with a DNA reporter, a RNA reporter, or both reporters in equimolar concentrations. Plotted is the end-point fluorescence (n=3).

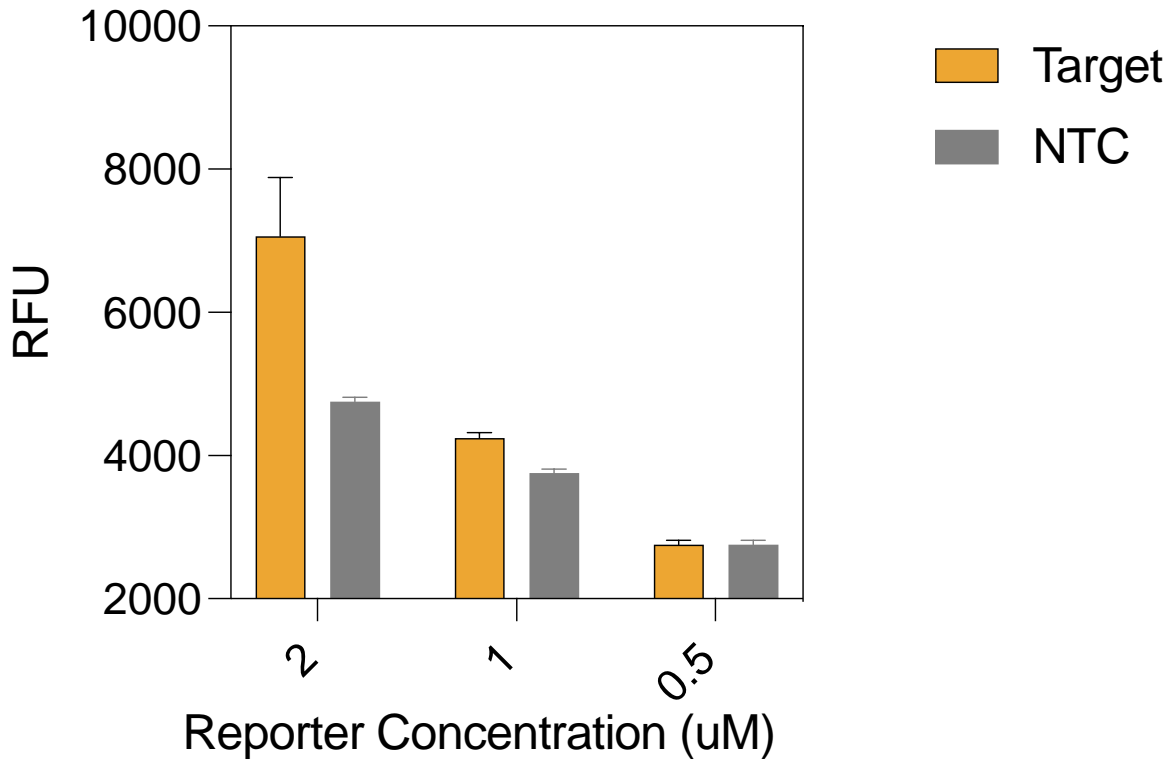

**Fig. S12 | Activity of TccCas13a on Poly U RNA reporters.** The CRISPRD reaction with TccCas13a RNP was incubated with RNase P (1 ng) and Fluorescence was measured after 2 hours (n=3).
